# Supplementary material
Source: ML conference proceedings conference paper supplement (https://openaccess.thecvf.com/content/CVPR2026/html/Li_CRAFT-LoRA_Content-Style_Personalization_CVPR_2026_paper.html)
Supplement: Supplementary file 1 [file Li_CRAFT-LoRA_Content-Style_Personalization_CVPR_2026_supplemental.pdf]

# CRAFT-LoRA: Content-Style Personalization via Rank-Constrained Adaptation and Training-Free Fusion

## Supplementary Material

### Appendix

#### A. Trunk (Backbone) Fine-tuning Details

##### A.1. Targeted Dataset Construction

We construct a dataset of 100 content–style contrast pairs,  $\mathcal{D} = \{(I_c^k, I_s^k)\}_{k=1}^{100}$ . This dataset is used to fine-tune the backbone, encouraging content–style disentanglement and providing the base weights ( $W_{\text{init}}$ ) for subsequent LoRA adapter training. The pairs are generated using a pre-trained diffusion model with frequency-based controls.

For each pair  $(I_c^k, I_s^k) \in \mathcal{D}$ : image  $I_c^k$  emphasizes content, guided by a content prompt  $P_c^k$  and a style modifier  $P_{sm}^k$ ; image  $I_s^k$  emphasizes style, guided by a style prompt  $P_s^k$  and a content modifier  $P_{cm}^k$ . One specific  $P_{sm}^k$  and one  $P_{cm}^k$  are chosen per pair to form a one-to-one contrast.

We employ frequency-domain manipulations during iterative denoising. Let  $\mathcal{F}$  denote a frequency transform (e.g., Discrete Cosine Transform) and  $\mathcal{F}^{-1}$  its inverse. Masks  $\mathcal{M}_{\text{low}}$  and  $\mathcal{M}_{\text{high}}$  preserve low- and high-frequency components, respectively. With noisy latent  $z_t$  at timestep  $t$  and text embedding  $e = \text{TextualEmbeddings}(P)$ , the process is:

$$\begin{aligned} \hat{z}_0 &= \text{Predictor}(z_t, t, e), & (\text{Predict clean latent}) \\ z_{t-1}^{\text{filtered}} &= \mathcal{F}^{-1}(\mathcal{M}_{\text{low}} \odot \mathcal{F}(\hat{z}_0)) & (\text{for } I_c^k \text{ generation}), \\ z_{t-1}^{\text{filtered}} &= \mathcal{F}^{-1}(\mathcal{M}_{\text{high}} \odot \mathcal{F}(\hat{z}_0)) & (\text{for } I_s^k \text{ generation}), \\ z_{t-1} &= \text{UpdateRule}(z_t, z_{t-1}^{\text{filtered}}, \dots), \end{aligned}$$

where  $\odot$  denotes element-wise multiplication. This design concentrates variation along the intended factor (content or style).

Table 2. Conceptual illustration of content–style contrast pair generation. For each pair  $(I_c^k, I_s^k)$ , one varying modifier is chosen for  $I_c^k$  and one for  $I_s^k$ .

| Property                  | $I_c^k$ (content fixed)                                    | $I_s^k$ (style fixed)                                     |
|---------------------------|------------------------------------------------------------|-----------------------------------------------------------|
| Target image              | Generated with fixed content                               | Generated with fixed style                                |
| Base prompt               | $P_c^k$ : "a red car"                                      | $P_s^k$ : "in the style of Van Gogh"                      |
| Varying modifier          | $P_{sm}^k \in \{\text{watercolor, oil painting, } \dots\}$ | $P_{cm}^k \in \{\text{starry night, sunflower, } \dots\}$ |
| Dominant frequency filter | Low $\mathcal{M}_{\text{low}}$                             | High $\mathcal{M}_{\text{high}}$                          |
| Resulting characteristic  | Content preserved with varied textures                     | Style preserved with varied subjects                      |

##### A.2. Training Settings

We fine-tune the backbone weights  $\{W_l\}_{l=1}^L$  by minimizing:

$$\mathcal{L}_{\text{trunk}} = \mathcal{L}_{\text{task}}(\{W_l\}, \mathcal{D}) + \lambda_{\text{reg}} \sum_{l=1}^L \|B_l\|_F^2, \quad (12)$$

where  $B_l$  is a learnable basis for each layer  $l$ . Let  $B_l = Q_l R_l$  be the QR decomposition of the basis, where  $Q_l$  contains the orthonormal vectors ( $Q_l^\top Q_l = I$ ). Consistent with the update rule discussed in the main text, the weights are updated as:

$$W_l = W_l^{(0)} - Q_l Q_l^\top W_l^{(0)}. \quad (13)$$

This update effectively projects the original weights  $W_l^{(0)}$  onto the orthogonal complement of the learned subspace  $\text{span}(Q_l)$ . We denote the resulting post-finetuning backbone as  $W_{\text{init}}$  (also written  $\widetilde{W}$  in figures). The update  $\Delta W_l = -Q_l Q_l^\top W_l^{(0)}$  lies in  $\text{span}(Q_l)$ .

The per-layer rank  $r_l$  for the basis  $B_l$  follows a linear schedule:

$$r_l = r_{\text{max}} - \frac{l-1}{L-1} (r_{\text{max}} - r_{\text{min}}), \quad l = 1, \dots, L, \quad (14)$$

with maximum rank  $r_{\text{max}} = 128$  and minimum rank  $r_{\text{min}} = 4$ .

The task loss  $\mathcal{L}_{\text{task}}$  (Eq. 15) is computed over the dataset  $\mathcal{D}$ . Here,  $N = 100$ ,  $G(\cdot)$  represents the  $\hat{x}_0$  predictor (i.e., the U-Net),  $t$  is a sampled timestep, and  $z_t$  is the corresponding noisy latent created from the target image.

The perceptual term  $\mathcal{L}_{\text{perceptual}}$  (Eq. 16) is defined as: where  $\phi_j$  are features from VGG-19 (relu1\_1 to relu5\_1) and  $M_j$  is the number of elements in the feature map. We set  $\alpha = 0.1$  and  $\lambda_{\text{reg}} = 1 \times 10^{-4}$ .

Optimization uses the AdamW optimizer with a cosine decay learning rate schedule and a 500-step warm-up. The learning rate starts at  $1 \times 10^{-5}$ , warms up from  $1 \times 10^{-6}$ , and decays to a minimum of  $1 \times 10^{-7}$ . We use a batch size of 8 and train for 5000 steps.

## B. LoRA Training and Inference Details

### B.1. Setting and Notation

LoRA adapters are trained on the U-Net backbone initialized with the pre-tuned weights  $W_{\text{init}}$  (from Eq. 13). We define disjoint sets of U-Net layers  $I_c$  (for content) and  $I_s$  (for style), satisfying  $I_c \cap I_s = \emptyset$ . The adapters are trained only on the layers specified in  $I_c \cup I_s$ .

$$\mathcal{L}_{\text{task}}(\{W_l\}, \mathcal{D}) = \frac{1}{N} \sum_{k=1}^N \mathbb{E}_{t, z_t} \left[ \left\| G(\{W_l\}, z_t, t, \text{TextualEmbeddings}(P_c^k, P_{sm}^k)) - I_c^k \right\|_1 \right. \\ \left. + \left\| G(\{W_l\}, z_t, t, \text{TextualEmbeddings}(P_{cm}^k, P_s^k)) - I_s^k \right\|_1 \right] + \alpha \mathcal{L}_{\text{perceptual}}(\{W_l\}, \mathcal{D}). \quad (15)$$

$$\mathcal{L}_{\text{perceptual}} = \frac{1}{N} \sum_{k=1}^N \mathbb{E}_{t, z_t} \sum_{j \in \text{VGG\_layers}} \frac{1}{M_j} \left[ \left\| \phi_j(G(\{W_l\}, z_t, t, \text{TextualEmbeddings}(P_c^k, P_{sm}^k))) - \phi_j(I_c^k) \right\|_1 \right. \\ \left. + \left\| \phi_j(G(\{W_l\}, z_t, t, \text{TextualEmbeddings}(P_{cm}^k, P_s^k))) - \phi_j(I_s^k) \right\|_1 \right]. \quad (16)$$

Table 3. Summary of backbone fine-tuning hyperparameters.

| Parameter                                   | Value                                             |
|---------------------------------------------|---------------------------------------------------|
| Optimizer                                   | AdamW                                             |
| Initial learning rate                       | $1 \times 10^{-5}$                                |
| LR schedule                                 | Cosine decay with 500 warm-up steps               |
| Minimum learning rate                       | $1 \times 10^{-7}$                                |
| Batch size                                  | 8                                                 |
| Optimization steps                          | 5000                                              |
| Tuned U-Net layers                          | Attention and standard convolutional layers       |
| Rank schedule $r_l$ (Eq. 14)                | Linear; $r_{\max} = 128$ , $r_{\min} = 4$         |
| $\mathcal{L}_{\text{task}}$ components      | $\ell_1$ + Perceptual (VGG-19 relu1_1 to relu5_1) |
| Perceptual loss weight $\alpha$             | 0.1                                               |
| $B_l$ regularization $\lambda_{\text{reg}}$ | $1 \times 10^{-4}$                                |
| Hardware                                    | 2 NVIDIA 4090 GPUs                                |

**LoRA parameterization.** For any layer  $i \in I_c \cup I_s$ , we use a fixed LoRA rank  $r = 16$ . Content adapters learn parameters  $\{B_i^{(c)}, A_i^{(c)}\}$  for  $i \in I_c$ ; style adapters learn parameters  $\{B_i^{(s)}, A_i^{(s)}\}$  for  $i \in I_s$ . The update is  $\Delta W_i = B_i A_i$ .

**Training procedure.** During content adapter training, gradients for  $\{B_i^{(c)}, A_i^{(c)}\}$  are enabled only for  $i \in I_c$  (and masked for  $i \in I_s$ ). Conversely, style adapter training only updates parameters for  $i \in I_s$ . Training hyperparameters are listed in Table 4. The specific layer assignments for content and style are shown in Table 5.

**Expert encoder and aggregation.** Three MLP encoders,  $E_t, E_c, E_s$ , produce 64-dimensional embeddings from a concept ID embedding, a CLIP content text embedding, and a CLIP style text embedding, respectively. Their concatenated features are fed into an aggregation head that outputs nonnegative scaling factors  $(\gamma_c, \gamma_s)$ . At inference, the aggregated

Table 4. LoRA adapter training hyperparameters.

| Parameter      | Value                           |
|----------------|---------------------------------|
| Optimizer      | AdamW                           |
| Learning rate  | $1 \times 10^{-5}$              |
| Training steps | 1000–2000                       |
| Batch size     | 1                               |
| Backbone host  | $W_{\text{init}}$ (from Eq. 13) |

weights are:

$$W^{\text{agg}} = W_{\text{init}} + \sum_{i \in I_c} E_i(\gamma_c \Delta W_i^{(c)}) + \sum_{i \in I_s} E_i(\gamma_s \Delta W_i^{(s)}),$$

where  $E_i(\cdot)$  is an operator that injects the low-rank update  $\Delta W_i = B_i A_i$  at layer  $i$ .

## B.2. Disentanglement Metrics and Results

## B.3. Semantic Extension Examples

## C. Asymmetric Classifier-Free Guidance (ACFG) for Timestep-Dependent Aggregation

We introduce Asymmetric Classifier-Free Guidance (ACFG) during the sampling process. In ACFG, the conditional branch (guidance-seeking) uses the dynamically aggregated LoRA weights, while the unconditional branch (guidance-free) always uses the static, pre-tuned backbone initialization  $W_{\text{init}}$ .

**Conditional weights.** For timestep  $t \in \{1, \dots, T\}$ , the weights for layer  $i$  are:

$$W_i^{\text{cond}}(t) = W_{\text{init}, i} + \gamma_c(t) \Delta W_i^{(c)} + \gamma_s(t) \Delta W_i^{(s)}, \quad (17)$$

Table 5. U-Net layer assignments for content ( $I_c$ ) and style ( $I_s$ ) adapters.

| Content layers ( $I_c$ )    | Style layers ( $I_s$ )      |
|-----------------------------|-----------------------------|
| down_blocks.2.attentions.0; | down_blocks.0.attentions.0; |
| mid_block.attentions.0;     | down_blocks.1.resnets.0;    |
| up_blocks.0.attentions.1;   | mid_block.resnets.1;        |
| up_blocks.1.attentions.0;   | down_blocks.0.resnets.1;    |
| up_blocks.2.attentions.0    | down_blocks.1.attentions.1  |

content-style loras combination with given prompts

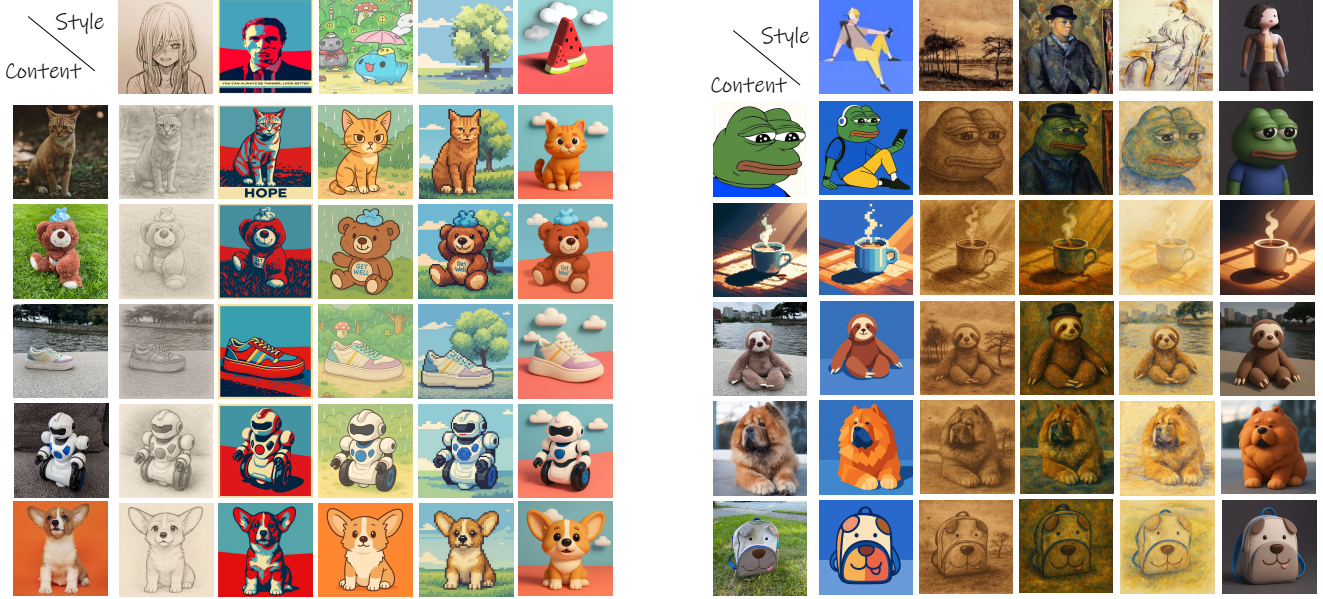

Figure 6. Visual results demonstrating content and style adapter performance.

Table 6. Disentanglement evaluation metrics.  $\mathcal{G}(p_c, p_s)$  denotes the final image generated from content prompt  $p_c$  and style prompt  $p_s$ . Higher is better for  $\mathcal{S}_c, \mathcal{S}_s$ ; lower is better for  $\mathcal{S}_x$ .

| Metric                               | Formula                                                                        | Description                  |
|--------------------------------------|--------------------------------------------------------------------------------|------------------------------|
| Content preservation $\mathcal{S}_c$ | $\frac{1}{N_s} \sum_{j=1}^{N_s} \text{sim}_c(\mathcal{G}(p'_c, p'_s^j), p'_c)$ | Similarity to target content |
| Style fidelity $\mathcal{S}_s$       | $\frac{1}{N_c} \sum_{i=1}^{N_c} \text{sim}_s(\mathcal{G}(p_c^i, p'_s), p'_s)$  | Similarity to target style   |
| Cross-influence $\mathcal{S}_x$      | $\frac{1}{N_c N_s} \sum_{i,j} \text{interference}(p_c^i, p'_s^j)$              | Undesired cross effect       |

where  $\gamma_c(t), \gamma_s(t) \geq 0$  are dynamic schedules (which can be binary or continuous). The unconditional weights are fixed:

$$W_i^{\text{uncond}}(t) = W_{\text{init},i} \quad \forall i, t. \quad (18)$$

Table 7. Quantitative comparison of content–style disentanglement.

| Method                                        | $\mathcal{S}_c \uparrow$ | $\mathcal{S}_s \uparrow$ | $\mathcal{S}_x \downarrow$ |
|-----------------------------------------------|--------------------------|--------------------------|----------------------------|
| Standard LoRA                                 | 0.75                     | 0.70                     | 0.42                       |
| Trunk fine-tune + layer-selective LoRA (Ours) | <b>0.90</b>              | <b>0.88</b>              | <b>0.18</b>                |

Table 8. Types of semantic extension (generalization).

| Type | Condition                          | Description                |
|------|------------------------------------|----------------------------|
| I    | $p'_c \neq p_c^i, p'_s = p_s^j$    | New content, trained style |
| II   | $p'_c = p_c^i, p'_s \neq p_s^j$    | Trained content, new style |
| III  | $p'_c \neq p_c^i, p'_s \neq p_s^j$ | New content, new style     |

**Guided prediction.** Let  $\epsilon_{\text{cond}} = \epsilon_{\theta}(x_t \mid \{W_i^{\text{cond}}(t)\}, \text{cond})$  be the noise estimate using conditional weights and  $\epsilon_{\text{uncond}} = \epsilon_{\theta}(x_t \mid \{W_i^{\text{uncond}}(t)\}, \emptyset)$  be the estimate using unconditional weights. The final ACFG

Table 9. Semantic extension examples via prompt variation.

| Trained content | Trained style    | Inference prompts                                  | Type |
|-----------------|------------------|----------------------------------------------------|------|
| “a red car”     | “Van Gogh style” | $p'_c$ : “a blue car”, $p'_s$ : “Van Gogh style”   | I    |
| “a red car”     | “Van Gogh style” | $p'_c$ : “a red car”, $p'_s$ : “sketch style”      | II   |
| “a red car”     | “Van Gogh style” | $p'_c$ : “a bicycle”, $p'_s$ : “sketch style”      | III  |
| “person ID X”   | “pixel art”      | $p'_c$ : “person ID Y”, $p'_s$ : “pixel art”       | I    |
| “person ID X”   | “pixel art”      | $p'_c$ : “person ID X”, $p'_s$ : “cyberpunk style” | II   |

prediction is:

$$\epsilon_{\theta}^{\text{acfg}}(t) = (1 + \omega) \epsilon_{\text{cond}} - \omega \epsilon_{\text{uncond}}. \quad (19)$$

where  $\omega$  is the guidance scale.

**Zero-shot temporal scaling.** We propose a smooth schedule

$$\alpha(t) = \alpha_{\min} + (\alpha_{\max} - \alpha_{\min}) g\left(\frac{T-t}{T}\right),$$

with a monotone function  $g : [0, 1] \rightarrow [0, 1]$  (e.g., a cosine schedule). This  $\alpha(t)$  modulates the aggregation weights  $\gamma_c(t)$  and  $\gamma_s(t)$  to emphasize content early in the sampling (high  $t$ ) and refine style later (low  $t$ ), while always keeping the unconditional branch fixed as in Eq. 18.

Table 10. Performance by content–style pairing with ACFG. Metric shown is a composite quality score (higher is better).

| Content–style pairing | Fixed-weights baseline | ACFG (ours) | Relative improvement |
|-----------------------|------------------------|-------------|----------------------|
| Similar semantics     | 0.81                   | 0.87        | +7.4%                |
| Distant semantics     | 0.68                   | 0.79        | +16.2%               |
| Complex composition   | 0.65                   | 0.80        | +23.1%               |

Table 11. Ablation of ACFG components. Higher indicates better quality.

| Component configuration                        | Quality score | Relative change |
|------------------------------------------------|---------------|-----------------|
| Full ACFG as proposed                          | 0.86          | Reference       |
| Constant temporal scaling (no time dependence) | 0.78          | −9.3%           |
| No low-rank constraint on temporal adjustments | 0.82          | −4.7%           |
| Standard CFG (uncond. path uses cond. weights) | 0.75          | −12.8%          |

## D. Additional Visualizations

Figures 6 and 7 provide additional qualitative results, complementing the visualizations in the main paper. These examples cover diverse objects, complex scenes, and challenging artistic styles, further demonstrating the robustness of our method. We also include failure cases to illustrate current limitations, such as difficulty with highly abstract styles or extreme compositional changes.

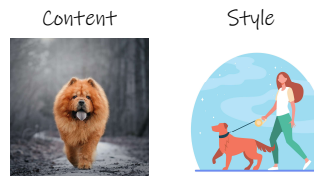

### Examples of the emphasis requirements on content and style

A dog <c> in <s> style

B - LoRA

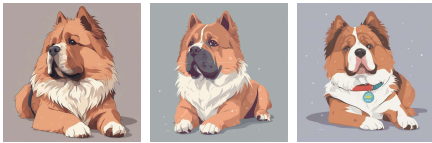

A dog <c> in <s> style, focusing on content/style elements

Ours

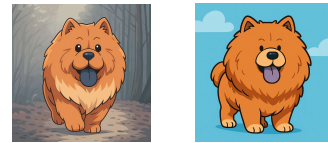

### Examples of the textual reference extension

(Following previous results) A dog <c> is playing a ball / is driving a car / is cooking a meal in style <s>

B - LoRA

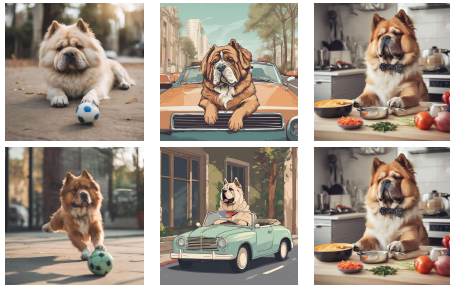

Ours

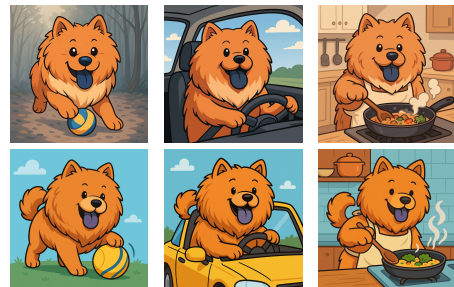

Figure 7. Additional visual results, including ACFG comparisons and semantic extensions.
